# Supplementary material for: Genome Sequencing of Consanguineous Family Implicates Ubiquitin-Specific Protease 53 (USP53) Variant in Psychosis/Schizophrenia: Wild-Type Expression in Murine Hippocampal CA 1–3 and Granular Dentate with AMPA Synapse Interactions
Source: MDPI journal article supplement (doi:10.3390/genes14101921), 2023-10-09
Supplement: s1 [file s1]

## **Supplementary Information**

**Genome sequencing of consanguineous family implicates ubiquitin specific  
protease (*USP53*) variant in psychosis/schizophrenia:**

**USP53 wild type expression in murine hippocampal CA 1-3 and granular  
dentate with AMPA synapse Interactions**

Ambreen Kanwal, Sohail A. Sheikh, Faiza Aslam, Samina Yaseen, Zachary  
Beetham, Nathan Pankratz, Sadaf Naz, José V. Pardo

|                                            |          |
|--------------------------------------------|----------|
| <b>Supplementary Information</b>           |          |
| <b>Supplementary Figures</b>               | p. 3-6   |
| <b>Supplementary Tables</b>                | p. 7-20  |
| <b>Supplementary Materials and Methods</b> | p. 21-29 |
| <b>Supplementary References</b>            | p. 30    |

## Supplementary Materials

Supplementary materials are published online alongside the manuscript (pdf).

Supplementary Figure 1. WGS/GATK/Genvisis Analysis.

Supplementary Figure 2. Other regions of homozygosity for pedigree PSY01.

Supplementary Figure 3. Samplot of structural variant signals vs. chromosome 4 location.

Supplementary Figure 4. Additional Sanger sequences for Figure 1.

Supplementary Table 1. Typical parameters from whole exome sequencing.

Supplementary Table 2. Primer sequences for amplification.

Supplementary Table 3. Rare homozygous variants in affected individuals and heterozygous in parent.

Supplementary Table 4. Genes of interest.

Supplementary Table 5. Autosomal dominant model: missense and LOF from genome sequencing data.

Supplementary Table 6. Autosomal recessive model: missense and LOF from genome sequencing data

(note: USP53 was excluded because GDI > 75 percentile threshold).

Supplementary Table 7. Antibodies used & concentrations.

Supplementary Table 8. Antibodies used in immunohistochemistry and western blots.

Supplementary Figure 1. WGS/GATK & Genvisis Analysis

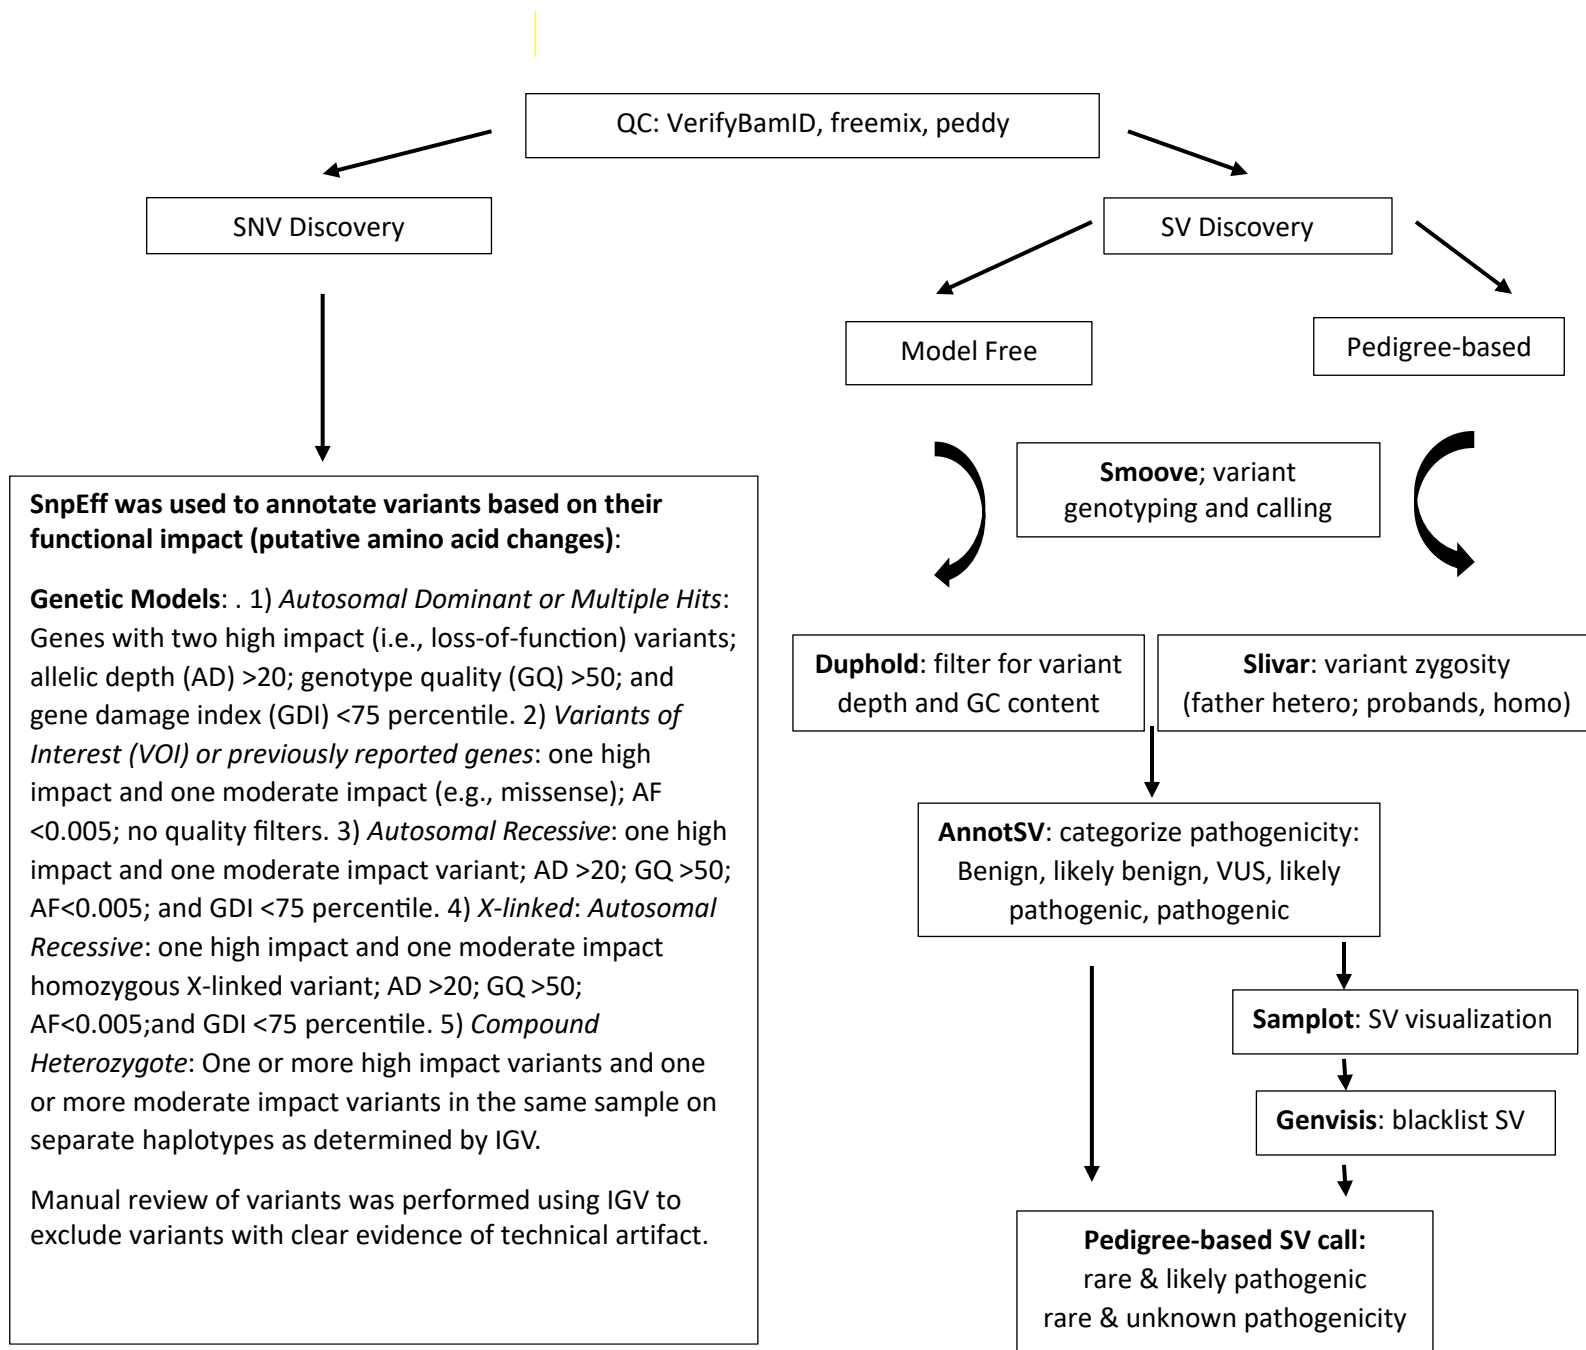

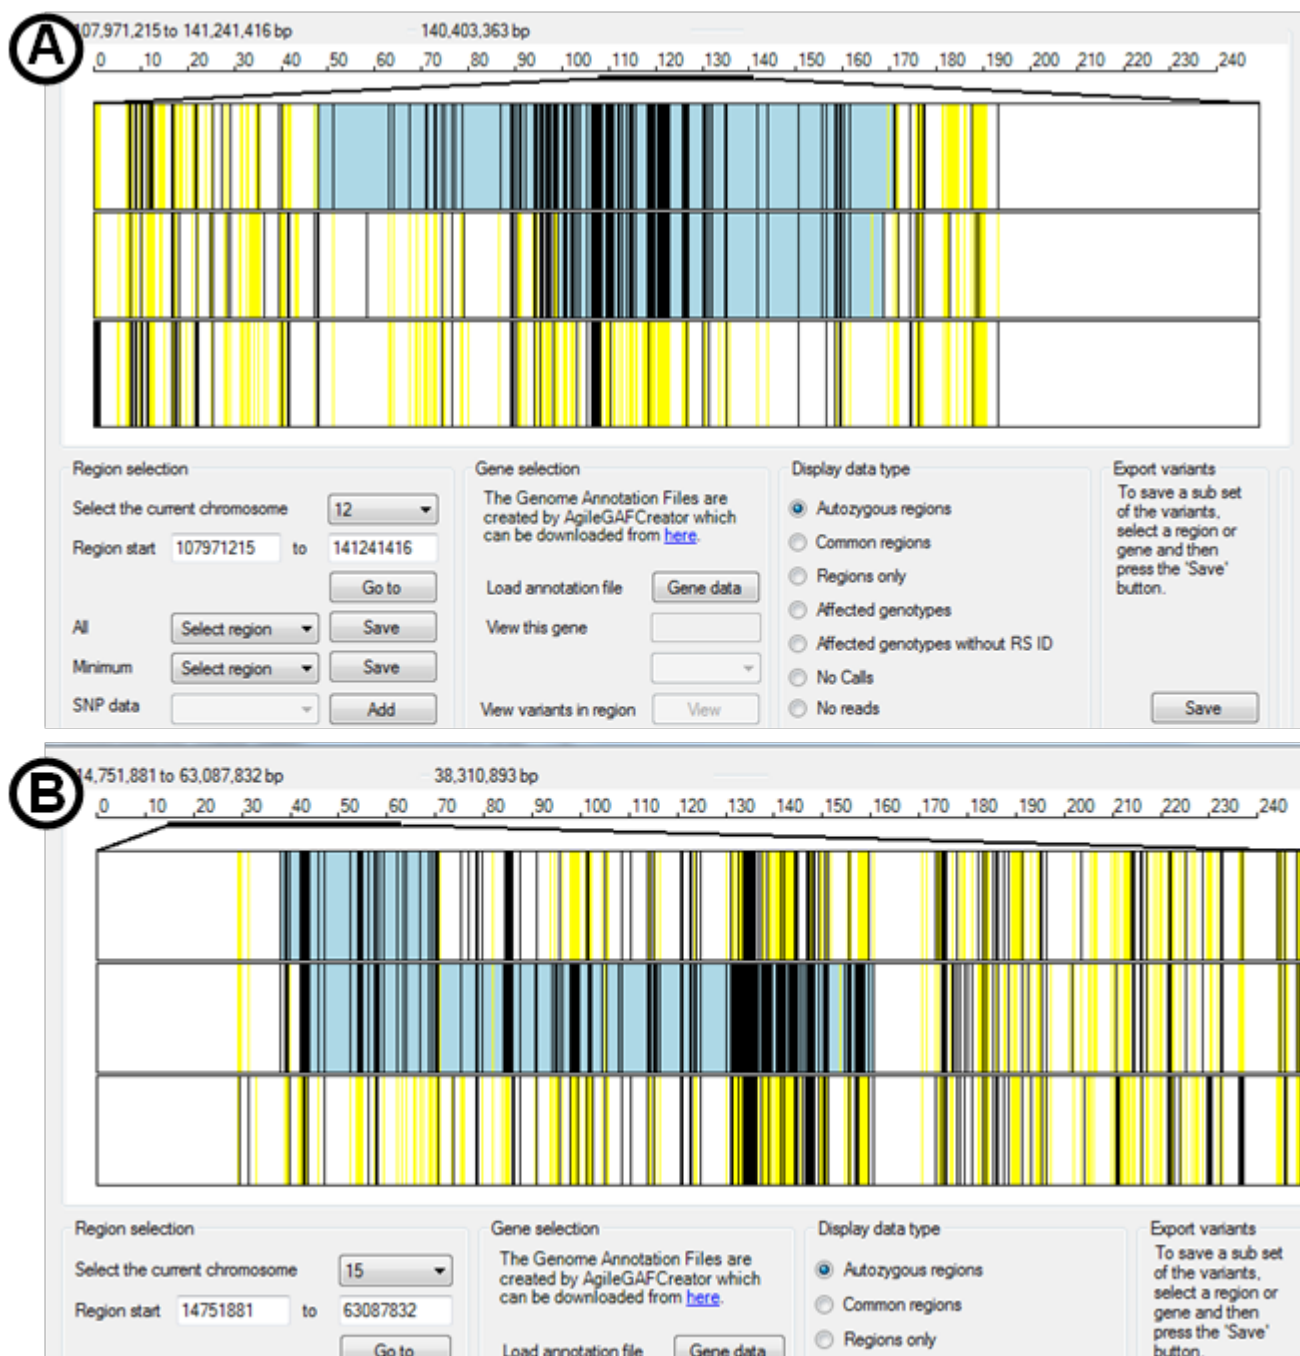

Supplementary Figure 21. Other regions of homozygosity for Family PSY01.

Based on homozygosity mapping, only 7 rare homozygous variants surfaced in the affected individuals but were heterozygous in the parent.

A) A region of homozygosity from exome data was displayed at 118-130 Mb on chr12 for two affected individuals of family PSY01 that was heterozygous in the parent. However, none of the variants located in this region were likely to be pathogenic (please see Supplementary Table 2). B) A region of homozygosity from exome data was displayed at 21-33 Mb on chr15 for two affected individuals of family PSY01 that was heterozygous in the parent. However, no rare exonic or intronic variant was detected in the exome data (Please see Supplementary Table 1).

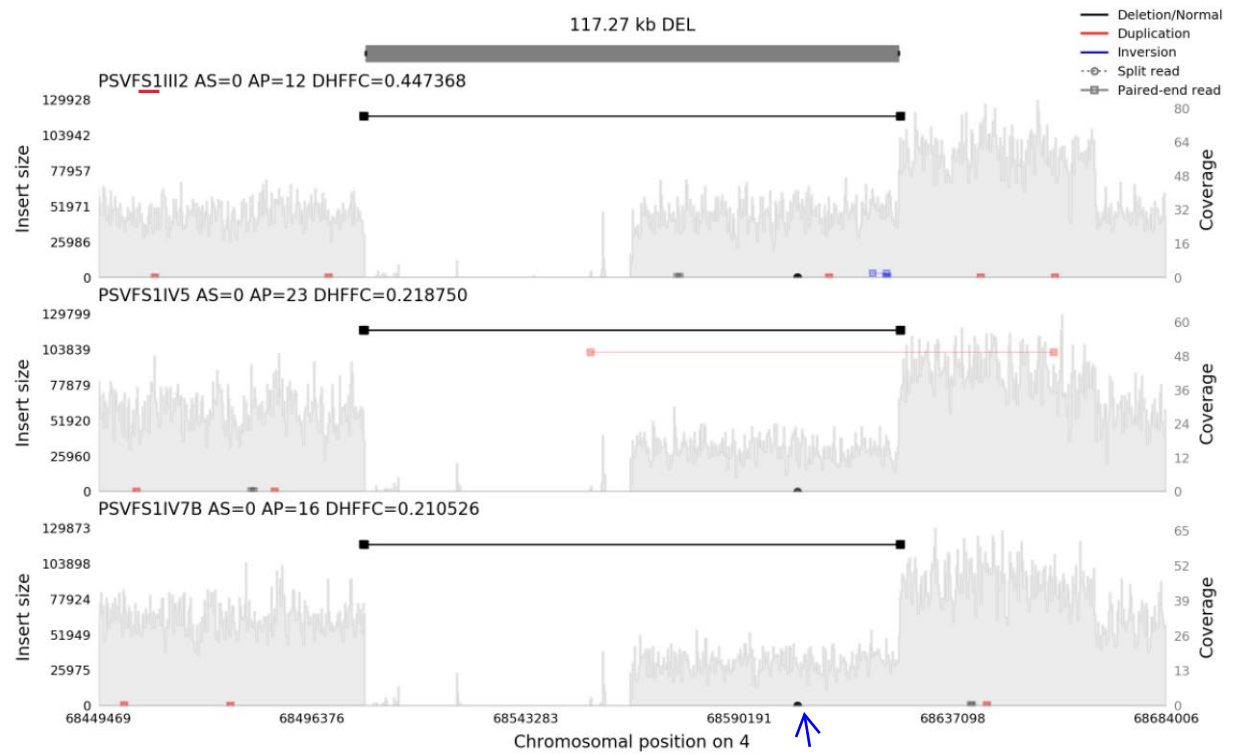

Supplementary Figure 3'. Samplot of structural variant signals vs. chromosome 4 location. Plot shows insert size and coverage on the abscissas with the location of the 304 bp deletion (arrow) and 117 kb deletion for father and both affected daughters. DHFFC, duphold flank fold-change.

Supplementary Figure 4. Additional Sanger sequences (for Figure 1)

***USP53* c.682T>C; p.(Cys228Arg)**

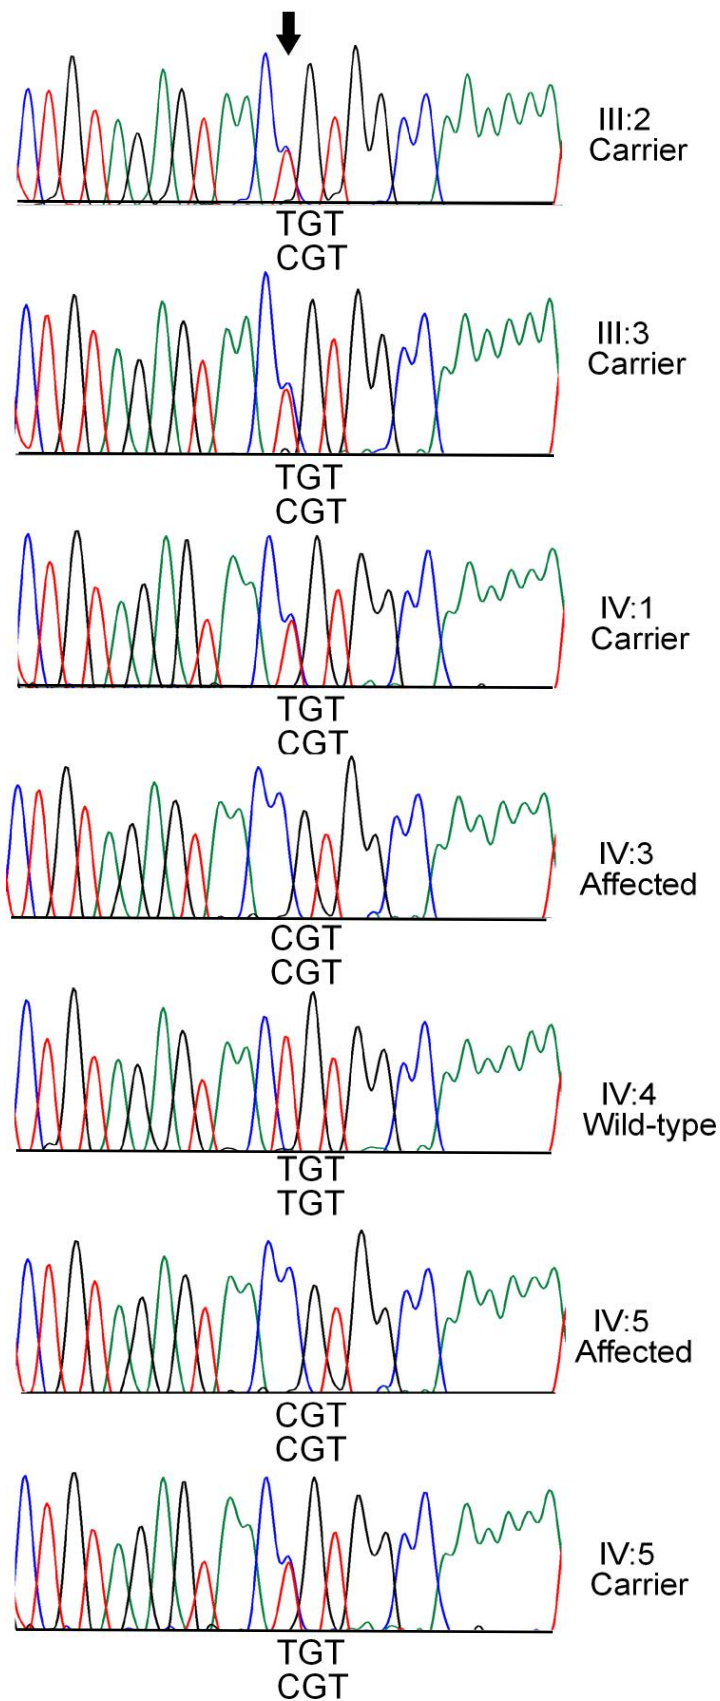

Supplementary Table 1. Typical WES output parameters.

| Parameter                 | Value              |
|---------------------------|--------------------|
| Total reads               | 4(10) <sup>7</sup> |
| Total yield bp            | 6(10) <sup>9</sup> |
| Average read length bp    | 149                |
| Target regions bp         | 5(10)              |
| % target coverage         | 97                 |
| Average target depth      | 75                 |
| % On-target reads         | 76                 |
| % exome covered > once    | 99.6               |
| # SNPs                    | 82K                |
| # missense variants       | 10.6K              |
| # frame shift variants    | 290                |
| # stop loss               | 36                 |
| # stop gain               | 83                 |
| mean depth target regions | 65                 |
| # Indels                  | 11K                |

Supplementary Table 2. Primers for amplification.

| Primer name          | Sequence                                                             | Product (size bp) | *Comment                                                    |
|----------------------|----------------------------------------------------------------------|-------------------|-------------------------------------------------------------|
| USP53_F<br>USP53_R   | TGACTTCAAGAGTTTTATTTCTGC<br>AGGCATTCCAGTTAGCCTGA                     | 525               | For amplification and Sanger sequencing                     |
| USP53_OF<br>USP53_OR | TTGATGAATGATGAATGATACTCTTTTCTCATC<br>GAAGAATTTGAAAATAAAAGGGAAGGGAATG | 505               | For use in Tetra-ARMS PCR, constant product                 |
| USP53_MF             | TTTAAACTTTTATGTTTTTCTGTAGAGTA <u><b>C</b></u> CC                     | 223               | Yields product with USP53_OR only from the mutant allele    |
| USP53_NR             | ACGGCGAATTTTTATTTTTTGGCC <u><b>C</b></u> CA                          | 347               | Yields product with USP53_OF only from the wild-type allele |

Primers for PCR amplification and Sanger sequencing were designed using primer3 (<https://bioinfo.ut.ee/primer3-0.4.0/>). PCR reactions were performed under standard conditions and purified products were sequenced using BigDye Terminators v3.1. Primers for Tetra-Primers ARMS PCR were designed using primer1 (<http://primer1.soton.ac.uk/primer1.html>). All four primers were used in one reaction of 10µl by using 1µM each (USP53\_OF - outer forward primer and USP53\_OR - outer reverse primer) & 10µM each (allele specific primers, mutant specific-USP53\_MF and wild-type specific - USP53\_NR) primers. Nucleotides in bold & underlined in the USP53\_MF and USP53\_NR primers indicate bases which were deliberately mismatched to avoid non-specific amplification by these primers of the wild-type or mutant alleles, respectively.



Supplementary Table3. Rare homozygous variants in affected individuals and heterozygous in parent.

| Gene                                                                                                                                                                                                                                                                                                                                          | *Position       | Trancrypt           | ΔcDNA         | Effect           | gnomAD<br>MAF | **Prediction                                                               | Comment                                                                                                                                                                       |
|-----------------------------------------------------------------------------------------------------------------------------------------------------------------------------------------------------------------------------------------------------------------------------------------------------------------------------------------------|-----------------|---------------------|---------------|------------------|---------------|----------------------------------------------------------------------------|-------------------------------------------------------------------------------------------------------------------------------------------------------------------------------|
| <i>PRSS12</i>                                                                                                                                                                                                                                                                                                                                 | Chr4:119203363  | NM_003619.<br>4     | c.2356A<br>>G | p.Ile786Val      | 0.00001193‡   | Benign;<br>ACMG variant of<br>unknown significance                         | The amino acid is not conserved in evolution. Mouse and xenopus othologs have valine in this position. Mean allele frequency (MAF) = 0.003                                    |
| <i>USP53</i>                                                                                                                                                                                                                                                                                                                                  | Chr4:120181668  | NM_019050.<br>2     | c.682T><br>C  | p.Cys228Arg      | 0.00002499‡   | Deleterious;<br>ACMG variant of<br>unknown significance                    | Affected amino acid is conserved in evolution, variant segregates with the phenotype. The variant was absent from 600 ethnically matched chromosomes of unrelated individuals |
| <i>BBS12</i>                                                                                                                                                                                                                                                                                                                                  | Chr4:123664553  | NM_152618.<br>3     | c.1506C<br>>T | p.Ala502Ala      | 0.0002585‡    | None;<br>ACMG likely benign;<br>ClinVAR<br>VCV000166729.6<br>likely benign | Synonymous variant. MAF = 0.01, including one homozygous individual.                                                                                                          |
| <i>LRRC43</i>                                                                                                                                                                                                                                                                                                                                 | Chr12:122685380 | NM_001098.<br>519.2 | c.1708G<br>>T | p.Val570Leu      | 0.0001987°    | Benign;<br>ACMG likely benign                                              | The amino acid is not conserved in evolution. Canine ortholog has Leucine in this position.                                                                                   |
| <i>DNAH10</i>                                                                                                                                                                                                                                                                                                                                 | Chr12:124323125 | NM_207437.<br>3     | c.4671C<br>>T | p.Tyr1557Tyr     | 0.001147°     | Benign;<br>ACMG likely benign                                              | Synonymous variant, MAF = 0.003.                                                                                                                                              |
| <i>NCOR2</i>                                                                                                                                                                                                                                                                                                                                  | Chr12:124821723 | NM_006312.<br>6     | c.5691C<br>>T | p.Ser1897Se<br>r | 0.00005492‡   | None;<br>ACMG variant of<br>unknown significance                           | Synonymous variant, Neither the nucleotide nor the affected amino acid is conserved in evolution.                                                                             |
| <i>DHX37</i>                                                                                                                                                                                                                                                                                                                                  | Chr12:125450356 | NM_032656.<br>4     | c.1593G<br>>A | p.Val531Val      | 0.00005992‡   | None;<br>ACMG variant of<br>unknown significance                           | Synonymous variant. Neither the nucleotide nor the affected amino acid is conserved in evolution. MAF = 0.003.                                                                |
| *Variant position according to Human Feb.2009 (GRCh 37/hg19) Assembly. ** Pathogenicity predictions from multiple software as well as from ACMG classification. ACMG = American College of Medical Genetics and Genomics interpretation; gnomAD = genome Aggregation Database; MAF = mean allele frequency; ‡, non-homozygous; °, homozygous. |                 |                     |               |                  |               |                                                                            |                                                                                                                                                                               |

Supplementary Table 4. Genes of interest.

| Case | Gene         | Variant     | Locus and Reference Allele | Allele 1 and Allele 2 | GQ | AD      | Impact           | AF     | CADD | GDI      |
|------|--------------|-------------|----------------------------|-----------------------|----|---------|------------------|--------|------|----------|
| IV:3 | <i>USP53</i> | p.Cys228Arg | 4:119260513-TRUE           | [C, C]                | 81 | [0, 27] | missense_variant | 0.0004 | 27.6 | 82.83479 |
| IV:5 | <i>USP53</i> | p.Cys228Arg | 4:119260513-TRUE           | [C, C]                | 99 | [0, 33] | missense_variant | 0.0004 | 27.6 | 82.83479 |

GQ, genotype quality; AD, allelic depth; AF, allele frequency; NMD, nonsense mediated decay; CADD, Combined Annotation Dependent Depletion; GDI, Gene Damage Index

**Supplementary Table 5. Autosomal dominant model: missense and LOF from genome sequencing data.**

| Case | Gene           | Variant     | Locus and Reference Allele | Allele 1 and Allele 2 | GQ | AD       | Impact                                 | AF         | CADD  | GDI       |
|------|----------------|-------------|----------------------------|-----------------------|----|----------|----------------------------------------|------------|-------|-----------|
| IV:3 | <i>BOP1</i>    | p.Val724Ile | 8:144262235-C              | [C*, T]               | 99 | [20, 26] | missense_variant                       | 0.00260000 | 22.6  | 4.704198  |
| IV:5 | <i>BOP1</i>    | p.Val724Ile | 8:144262235-C              | [C*, T]               | 99 | [22, 21] | missense_variant                       | 0.00260000 | 22.6  | 4.704198  |
| IV:3 | <i>RNASE12</i> | p.Glu17Gly  | 14:20590674-T              | [T*, C]               | 99 | [16, 20] | missense_variant                       | 0.00040000 | 24.6  | 7.158562  |
| IV:5 | <i>RNASE12</i> | p.Glu17Gly  | 14:20590674-T              | [T*, C]               | 99 | [19, 19] | missense_variant                       | 0.00040000 | 24.6  | 7.158562  |
| IV:3 | <i>SPR</i>     | p.Arg177Cys | 2:72888538-C               | [C*, T]               | 99 | [12, 23] | missense_variant                       | 0.00000000 | 34    | 8.467556  |
| IV:5 | <i>SPR</i>     | p.Arg177Cys | 2:72888538-C               | [C*, T]               | 99 | [12, 22] | missense_variant                       | 0.00000000 | 34    | 8.467556  |
| IV:3 | <i>PHYHIPL</i> | p.Arg10Ser  | 10:59234305-G              | [G*, T]               | 99 | [10, 12] | missense_variant&splice_region_variant | 0.00006172 | 10.27 | 8.774352  |
| IV:5 | <i>PHYHIPL</i> | p.Arg10Ser  | 10:59234305-G              | [G*, T]               | 99 | [13, 9]  | missense_variant&splice_region_variant | 0.00006172 | 10.27 | 8.774352  |
| IV:3 | <i>BAG2</i>    | p.Val146Gly | 6:57183991-T               | [T*, G]               | 99 | [15, 15] | missense_variant                       | 0.00290000 | 13.75 | 9.106714  |
| IV:5 | <i>BAG2</i>    | p.Val146Gly | 6:57183991-T               | [T*, G]               | 99 | [12, 19] | missense_variant                       | 0.00290000 | 13.75 | 9.106714  |
| IV:3 | <i>GNG8</i>    | p.Val68Ile  | 19:46634087-C              | [C*, T]               | 99 | [22, 15] | missense_variant                       | 0.00300000 | 14.63 | 11.213376 |
| IV:5 | <i>GNG8</i>    | p.Val68Ile  | 19:46634087-C              | [C*, T]               | 99 | [17, 17] | missense_variant                       | 0.00300000 | 14.63 | 11.213376 |
| IV:3 | <i>FAM57A</i>  | p.Arg111Gln | 17:737971-G                | [G*, A]               | 99 | [23, 15] | missense_variant                       | 0.00070000 | 12.92 | 15.738610 |
| IV:5 | <i>FAM57A</i>  | p.Arg111Gln | 17:737971-G                | [G*, A]               | 99 | [7, 20]  | missense_variant                       | 0.00070000 | 12.92 | 15.738610 |
| IV:3 | <i>CARD18</i>  | p.Glu40Lys  | 11:105138851-C             | [C*, T]               | 99 | [14, 19] | missense_variant                       | 0.00340000 | 19.66 | 15.799969 |
| IV:5 | <i>CARD18</i>  | p.Glu40Lys  | 11:105138851-C             | [C*, T]               | 99 | [22, 13] | missense_variant                       | 0.00340000 | 19.66 | 15.799969 |
| IV:3 | <i>TDRP</i>    | p.Lys197Gln | 8:491580-T                 | [T*, G]               | 99 | [21, 15] | missense_variant                       | 0.00410000 | 22.7  | 16.756149 |
| IV:5 | <i>TDRP</i>    | p.Lys197Gln | 8:491580-T                 | [T*, G]               | 99 | [10, 22] | missense_variant                       | 0.00410000 | 22.7  | 16.756149 |
| IV:3 | <i>NTNG1</i>   | p.Asn433Tyr | 1:107436706-A              | [A*, T]               | 99 | [13, 19] | missense_variant                       | 0.00020000 | 23.5  | 16.771488 |
| IV:5 | <i>NTNG1</i>   | p.Asn433Tyr | 1:107436706-A              | [A*, T]               | 99 | [17, 11] | missense_variant                       | 0.00020000 | 23.5  | 16.771488 |
| IV:3 | <i>TM2D2</i>   | p.Tyr145Cys | 8:38991543-T               | [C, C]                | 99 | [0, 36]  | missense_variant&splice_region_variant | 0.00000000 | 25.0  | 19.409930 |

| Case | Gene           | Variant      | Locus and Reference Allele | Allele 1 and Allele 2 | GQ | AD       | Impact                                  | AF         | CADD  | GDI       |
|------|----------------|--------------|----------------------------|-----------------------|----|----------|-----------------------------------------|------------|-------|-----------|
| IV:5 | <i>TM2D2</i>   | p.Tyr145Cys  | 8:38991543-T               | [T*, C]               | 99 | [21, 20] | missense_variant&splice_region_variant  | 0.00000000 | 25.0  | 19.409930 |
| IV:3 | <i>SIX3</i>    | p.Ser88Leu   | 2:44942367-C               | [C*, T]               | 99 | [8, 12]  | missense_variant                        | 0.00330000 | 24.1  | 23.428951 |
| IV:5 | <i>SIX3</i>    | p.Ser88Leu   | 2:44942367-C               | [C*, T]               | 99 | [11, 18] | missense_variant                        | 0.00330000 | 24.1  | 23.428951 |
| IV:3 | <i>PDK1</i>    | p.Ala386Ser  | 2:172592974-G              | [G*, T]               | 99 | [14, 9]  | missense_variant                        | 0.00030000 | 33    | 27.309915 |
| IV:5 | <i>PDK1</i>    | p.Ala386Ser  | 2:172592974-G              | [G*, T]               | 99 | [10, 16] | missense_variant                        | 0.00030000 | 33    | 27.309915 |
| IV:3 | <i>CIB2</i>    | p.Arg155Gln  | 15:78105688-C              | [C*, T]               | 99 | [22, 20] | missense_variant                        | 0.00430000 | 4.282 | 29.846091 |
| IV:5 | <i>CIB2</i>    | p.Arg155Gln  | 15:78105688-C              | [C*, T]               | 99 | [17, 20] | missense_variant                        | 0.00430000 | 4.282 | 29.846091 |
| IV:3 | <i>AP1B1</i>   | p.Ala446Thr  | 22:29349319-C              | [C*, T]               | 99 | [15, 28] | missense_variant                        | 0.00180000 | 34    | 31.579486 |
| IV:5 | <i>AP1B1</i>   | p.Ala446Thr  | 22:29349319-C              | [C*, T]               | 99 | [16, 16] | missense_variant                        | 0.00180000 | 34    | 31.579486 |
| IV:3 | <i>L3MBTL3</i> | p.Asn463His  | 6:130086194-A              | [A*, C]               | 99 | [20, 16] | missense_variant                        | 0.00000000 | 26.7  | 32.269776 |
| IV:5 | <i>L3MBTL3</i> | p.Asn463His  | 6:130086194-A              | [A*, C]               | 99 | [11, 20] | missense_variant                        | 0.00000000 | 26.7  | 32.269776 |
| IV:3 | <i>SAMD4B</i>  | p.Pro419Leu  | 19:39377636-C              | [C*, T]               | 99 | [22, 18] | missense_variant                        | 0.00180000 | 8.088 | 32.494759 |
| IV:5 | <i>SAMD4B</i>  | p.Pro419Leu  | 19:39377636-C              | [C*, T]               | 99 | [17, 18] | missense_variant                        | 0.00180000 | 8.088 | 32.494759 |
| IV:3 | <i>LRRC73</i>  | p.Thr83Ile   | 6:43509538-G               | [G*, A]               | 99 | [21, 19] | missense_variant                        | 0.00030000 | 21.6  | 35.097408 |
| IV:5 | <i>LRRC73</i>  | p.Thr83Ile   | 6:43509538-G               | [G*, A]               | 99 | [32, 23] | missense_variant                        | 0.00030000 | 21.6  | 35.097408 |
| IV:3 | <i>SCMH1</i>   | p.Ser19Thr   | 1:41152620-A               | [A*, T]               | 99 | [11, 10] | missense_variant                        | 0.00260000 | 9.880 | 36.554686 |
| IV:5 | <i>SCMH1</i>   | p.Ser19Thr   | 1:41152620-A               | [A*, T]               | 99 | [18, 17] | missense_variant                        | 0.00260000 | 9.880 | 36.554686 |
| IV:3 | <i>DGKD</i>    | p.Val1038Ile | 2:233462661-G              | [G*, A]               | 99 | [14, 18] | missense_variant                        | 0.00080000 | 23.1  | 37.142711 |
| IV:5 | <i>DGKD</i>    | p.Val1038Ile | 2:233462661-G              | [G*, A]               | 99 | [16, 24] | missense_variant                        | 0.00080000 | 23.1  | 37.142711 |
| IV:3 | <i>CDK10</i>   | p.Leu21Val   | 16:89687600-C              | [C*, G]               | 99 | [31, 27] | missense_variant&NMD_transcript_variant | 0.00030000 | .     | 37.316562 |
| IV:5 | <i>CDK10</i>   | p.Leu21Val   | 16:89687600-C              | [C*, G]               | 99 | [14, 19] | missense_variant&NMD_transcript_variant | 0.00030000 | .     | 37.316562 |
| IV:3 | <i>CDK7</i>    | p.Leu277Ser  | 5:69273007-T               | [T*, C]               | 99 | [14, 16] | missense_variant                        | 0.00000000 | 15.89 | 37.976172 |

| Case | Gene             | Variant     | Locus and Reference Allele | Allele 1 and Allele 2 | GQ | AD       | Impact           | AF         | CADD  | GDI       |
|------|------------------|-------------|----------------------------|-----------------------|----|----------|------------------|------------|-------|-----------|
| IV:5 | <i>CDK7</i>      | p.Leu277Ser | 5:69273007-T               | [T*, C]               | 99 | [11, 15] | missense_variant | 0.00000000 | 15.89 | 37.976172 |
| IV:3 | <i>CDC25A</i>    | p.Glu492Lys | 3:48159046-C               | [C*, T]               | 99 | [24, 20] | missense_variant | 0.00030000 | 27.4  | 38.594877 |
| IV:5 | <i>CDC25A</i>    | p.Pro20Ser  | 3:48187890-G               | [G*, A]               | 99 | [29, 34] | missense_variant | 0.00080000 | 0.154 | 38.594877 |
| IV:3 | <i>SP100</i>     | p.Arg838Cys | 2:230542000-C              | [C*, T]               | 99 | [18, 15] | missense_variant | 0.00100000 | 29.2  | 40.302705 |
| IV:5 | <i>SP100</i>     | p.Glu790Lys | 2:230515368-G              | [G*, A]               | 99 | [21, 20] | missense_variant | 0.00200000 | 10.22 | 40.302705 |
| IV:5 | <i>SP100</i>     | p.Arg838Cys | 2:230542000-C              | [C*, T]               | 99 | [21, 23] | missense_variant | 0.00100000 | 29.2  | 40.302705 |
| IV:3 | <i>DDX10</i>     | p.Ile240Thr | 11:108679431-T             | [T*, C]               | 99 | [11, 13] | missense_variant | 0.00020000 | 25.7  | 40.824257 |
| IV:5 | <i>DDX10</i>     | p.Ile240Thr | 11:108679431-T             | [T*, C]               | 99 | [14, 20] | missense_variant | 0.00020000 | 25.7  | 40.824257 |
| IV:3 | <i>EIF4ENIF1</i> | p.Met610Thr | 22:31448172-A              | [A*, G]               | 99 | [19, 24] | missense_variant | 0.00040000 | 17.23 | 41.463415 |
| IV:5 | <i>EIF4ENIF1</i> | p.Met610Thr | 22:31448172-A              | [A*, G]               | 99 | [17, 19] | missense_variant | 0.00040000 | 17.23 | 41.463415 |
| IV:3 | <i>ACOT6</i>     | p.His52Arg  | 14:73619370-A              | [A*, G]               | 99 | [20, 13] | missense_variant | 0.00340000 | 5.237 | 42.567879 |
| IV:5 | <i>ACOT6</i>     | p.His52Arg  | 14:73619370-A              | [A*, G]               | 99 | [18, 16] | missense_variant | 0.00340000 | 5.237 | 42.567879 |
| IV:3 | <i>PLAU</i>      | p.Arg201Leu | 10:73913680-G              | [G*, T]               | 99 | [16, 22] | missense_variant | 0.00220000 | 23.8  | 44.142762 |
| IV:5 | <i>PLAU</i>      | p.Arg201Leu | 10:73913680-G              | [T, T]                | 99 | [0, 48]  | missense_variant | 0.00220000 | 23.8  | 44.142762 |
| IV:3 | <i>PSMB11</i>    | p.Thr14Ser  | 14:23042265-A              | [A*, T]               | 99 | [24, 16] | missense_variant | 0.00030000 | 0.048 | 44.613182 |
| IV:5 | <i>PSMB11</i>    | p.Thr14Ser  | 14:23042265-A              | [A*, T]               | 99 | [16, 18] | missense_variant | 0.00030000 | 0.048 | 44.613182 |
| IV:3 | <i>FAM126A</i>   | p.Tyr27His  | 7:22984018-A               | [A*, G]               | 99 | [16, 12] | missense_variant | 0.00000000 | 27.6  | 46.121593 |
| IV:5 | <i>FAM126A</i>   | p.Tyr27His  | 7:22984018-A               | [A*, G]               | 99 | [17, 18] | missense_variant | 0.00000000 | 27.6  | 46.121593 |
| IV:3 | <i>SNAI3</i>     | p.Arg268Gln | 16:88678524-C              | [C*, T]               | 99 | [23, 19] | missense_variant | 0.00150000 | 1.360 | 46.464182 |
| IV:5 | <i>SNAI3</i>     | p.Arg268Gln | 16:88678524-C              | [C*, T]               | 99 | [30, 25] | missense_variant | 0.00150000 | 1.360 | 46.464182 |
| IV:3 | <i>ZC3H18</i>    | p.Pro885Leu | 16:88630572-C              | [C*, T]               | 99 | [15, 27] | missense_variant | 0.00260000 | 7.829 | 47.164698 |
| IV:5 | <i>ZC3H18</i>    | p.Pro885Leu | 16:88630572-C              | [C*, T]               | 99 | [25, 20] | missense_variant | 0.00260000 | 7.829 | 47.164698 |

| Case | Gene           | Variant      | Locus and Reference Allele | Allele 1 and Allele 2 | GQ | AD       | Impact           | AF         | CADD  | GDI       |
|------|----------------|--------------|----------------------------|-----------------------|----|----------|------------------|------------|-------|-----------|
| IV:3 | <i>MFHAS1</i>  | p.Asn856Asp  | 8:8890493-T                | [T*, C]               | 99 | [13, 21] | missense_variant | 0.00070000 | 13.37 | 47.808969 |
| IV:5 | <i>MFHAS1</i>  | p.Asn856Asp  | 8:8890493-T                | [T*, C]               | 99 | [16, 22] | missense_variant | 0.00070000 | 13.37 | 47.808969 |
| IV:3 | <i>NRP2</i>    | p.Leu441Phe  | 2:205743232-C              | [C*, T]               | 99 | [18, 8]  | missense_variant | 0.00280000 | 25.1  | 47.947027 |
| IV:5 | <i>NRP2</i>    | p.Leu441Phe  | 2:205743232-C              | [C*, T]               | 99 | [19, 12] | missense_variant | 0.00280000 | 25.1  | 47.947027 |
| IV:3 | <i>ARHGAP5</i> | p.Ile1502Met | 14:32154945-A              | [A*, G]               | 99 | [21, 12] | missense_variant | 0.00200000 | 22.8  | 48.662883 |
| IV:5 | <i>ARHGAP5</i> | p.Pro1466Leu | 14:32154836-C              | [C*, T]               | 99 | [12, 12] | missense_variant | 0.00030000 | 24.5  | 48.662883 |
| IV:5 | <i>ARHGAP5</i> | p.Ile1502Met | 14:32154945-A              | [A*, G]               | 99 | [13, 12] | missense_variant | 0.00200000 | 22.8  | 48.662883 |
| IV:3 | <i>USP32</i>   | p.Leu965Phe  | 17:60208091-G              | [G*, A]               | 99 | [16, 8]  | missense_variant | 0.00030000 | 28.3  | 49.266247 |
| IV:5 | <i>USP32</i>   | p.Leu965Phe  | 17:60208091-G              | [G*, A]               | 99 | [14, 11] | missense_variant | 0.00030000 | 28.3  | 49.266247 |
| IV:3 | <i>PTPRE</i>   | p.Gly416Ser  | 10:128070403-G             | [G*, A]               | 99 | [15, 20] | missense_variant | 0.00060000 | 5.582 | 49.312267 |
| IV:5 | <i>PTPRE</i>   | p.Gly416Ser  | 10:128070403-G             | [G*, A]               | 99 | [18, 17] | missense_variant | 0.00060000 | 5.582 | 49.312267 |
| IV:3 | <i>RABEP1</i>  | p.Asp70Asn   | 17:5331993-G               | [G*, A]               | 99 | [8, 13]  | missense_variant | 0.00100000 | 25.1  | 49.322493 |
| IV:5 | <i>RABEP1</i>  | p.Asp70Asn   | 17:5331993-G               | [G*, A]               | 99 | [24, 15] | missense_variant | 0.00100000 | 25.1  | 49.322493 |
| IV:3 | <i>ZBTB11</i>  | p.Asn428Ser  | 3:101665304-T              | [T*, C]               | 99 | [16, 20] | missense_variant | 0.00100000 | 0.001 | 50.943396 |
| IV:5 | <i>ZBTB11</i>  | p.Asn428Ser  | 3:101665304-T              | [T*, C]               | 99 | [16, 14] | missense_variant | 0.00100000 | 0.001 | 50.943396 |
| IV:3 | <i>MBOAT4</i>  | p.Ser278Arg  | 8:30132417-G               | [T, T]                | 93 | [0, 31]  | missense_variant | 0.00060000 | 1.966 | 51.812650 |
| IV:5 | <i>MBOAT4</i>  | p.Ser278Arg  | 8:30132417-G               | [G*, T]               | 99 | [16, 23] | missense_variant | 0.00060000 | 1.966 | 51.812650 |
| IV:3 | <i>CDH4</i>    | p.Val640Ile  | 20:61928336-G              | [G*, A]               | 99 | [22, 19] | missense_variant | 0.00120000 | 10.54 | 53.157437 |
| IV:5 | <i>CDH4</i>    | p.Val640Ile  | 20:61928336-G              | [G*, A]               | 99 | [21, 23] | missense_variant | 0.00120000 | 10.54 | 53.157437 |
| IV:3 | <i>LSP1</i>    | p.Gly138Arg  | 11:1866886-G               | [G*, A]               | 99 | [28, 28] | missense_variant | 0.00310000 | 3.566 | 54.169862 |
| IV:5 | <i>LSP1</i>    | p.Gly138Arg  | 11:1866886-G               | [G*, A]               | 99 | [26, 24] | missense_variant | 0.00310000 | 3.566 | 54.169862 |
| IV:3 | <i>TRIM25</i>  | p.Lys313Glu  | 17:56901569-T              | [T*, C]               | 99 | [15, 12] | missense_variant | 0.00170000 | 23.2  | 55.739633 |

| Case | Gene           | Variant      | Locus and Reference Allele | Allele 1 and Allele 2 | GQ | AD       | Impact           | AF         | CADD  | GDI       |
|------|----------------|--------------|----------------------------|-----------------------|----|----------|------------------|------------|-------|-----------|
| IV:5 | <i>TRIM25</i>  | p.Lys313Glu  | 17:56901569-T              | [T*, C]               | 99 | [23, 16] | missense_variant | 0.00170000 | 23.2  | 55.739633 |
| IV:3 | <i>BTBD</i>    | p.Tyr454Cys  | 3:15645217-A               | [A*, G]               | 99 | [11, 16] | missense_variant | 0.00210000 | 24.4  | 56.342997 |
| IV:5 | <i>BTBD</i>    | p.Tyr454Cys  | 3:15645217-A               | [A*, G]               | 99 | [20, 15] | missense_variant | 0.00210000 | 24.4  | 56.342997 |
| IV:3 | <i>USP20</i>   | p.Tyr663Cys  | 9:129874895-A              | [A*, G]               | 99 | [20, 19] | missense_variant | 0.00070000 | 23.6  | 57.621312 |
| IV:5 | <i>USP20</i>   | p.Tyr663Cys  | 9:129874895-A              | [A*, G]               | 99 | [25, 13] | missense_variant | 0.00070000 | 23.6  | 57.621312 |
| IV:3 | <i>ZFYVE16</i> | p.Gln26Pro   | 5:80436762-A               | [A*, C]               | 99 | [13, 18] | missense_variant | 0.00260000 | 21.3  | 58.991665 |
| IV:5 | <i>ZFYVE16</i> | p.Gln26Pro   | 5:80436762-A               | [A*, C]               | 99 | [8, 11]  | missense_variant | 0.00260000 | 21.3  | 58.991665 |
| IV:3 | <i>MTDH</i>    | p.Ser529Cys  | 8:97722943-C               | [C*, G]               | 99 | [14, 17] | missense_variant | 0.00230000 | 28.1  | 59.073478 |
| IV:5 | <i>MTDH</i>    | p.Ser529Cys  | 8:97722943-C               | [C*, G]               | 99 | [19, 20] | missense_variant | 0.00230000 | 28.1  | 59.073478 |
| IV:3 | <i>SRCIN1</i>  | p.Arg816His  | 17:38552480-C              | [C*, T]               | 99 | [22, 19] | missense_variant | 0.00200000 | 33    | 60.990950 |
| IV:5 | <i>SRCIN1</i>  | p.Arg816His  | 17:38552480-C              | [C*, T]               | 99 | [25, 24] | missense_variant | 0.00200000 | 33    | 60.990950 |
| IV:3 | <i>SYNJ2</i>   | p.Glu66Lys   | 6:158017272-G              | [G*, A]               | 99 | [22, 16] | missense_variant | 0.00010000 | 24.9  | 61.011403 |
| IV:5 | <i>SYNJ2</i>   | p.Glu66Lys   | 6:158017272-G              | [G*, A]               | 99 | [13, 19] | missense_variant | 0.00010000 | 24.9  | 61.011403 |
| IV:3 | <i>SYT5</i>    | p.Gly38Arg   | 19:55179094-C              | [C*, T]               | 99 | [12, 20] | missense_variant | 0.00290000 | 14.20 | 62.202792 |
| IV:5 | <i>SYT5</i>    | p.Gly38Arg   | 19:55179094-C              | [C*, T]               | 99 | [14, 23] | missense_variant | 0.00290000 | 14.20 | 62.202792 |
| IV:3 | <i>IL17REL</i> | p.Arg320His  | 22:49997335-C              | [C*, T]               | 99 | [22, 19] | missense_variant | 0.00280000 | 6.559 | 62.274377 |
| IV:5 | <i>IL17REL</i> | p.Arg320His  | 22:49997335-C              | [C*, T]               | 99 | [18, 21] | missense_variant | 0.00280000 | 6.559 | 62.274377 |
| IV:3 | <i>ETV7</i>    | p.Pro296Ser  | 6:36366897-G               | [G*, A]               | 99 | [17, 12] | missense_variant | 0.00200000 | 26.9  | 63.235670 |
| IV:5 | <i>ETV7</i>    | p.Pro296Ser  | 6:36366897-G               | [G*, A]               | 99 | [14, 19] | missense_variant | 0.00200000 | 26.9  | 63.235670 |
| IV:3 | <i>BRPF3</i>   | p.Pro834Leu  | 6:36213898-C               | [C*, T]               | 99 | [17, 13] | missense_variant | 0.00130000 | 18.32 | 63.685637 |
| IV:5 | <i>BRPF3</i>   | p.Pro834Leu  | 6:36213898-C               | [C*, T]               | 99 | [16, 23] | missense_variant | 0.00130000 | 18.32 | 63.685637 |
| IV:3 | <i>TBC1D9B</i> | p.Glu1083del | 5:179863949-GTCC           | [GTCC*, G]            | 99 | [18, 14] | inframe_deletion | 0.00140000 | .     | 65.066217 |

| Case | Gene            | Variant      | Locus and Reference Allele | Allele 1 and Allele 2 | GQ | AD       | Impact                                 | AF         | CADD  | GDI       |
|------|-----------------|--------------|----------------------------|-----------------------|----|----------|----------------------------------------|------------|-------|-----------|
| IV:5 | <i>TBC1D9B</i>  | p.Glu1083del | 5:179863949-GTCC           | [GTCC*, G]            | 99 | [22, 15] | inframe_deletion                       | 0.00140000 | .     | 65.066217 |
| IV:3 | <i>BIRC6</i>    | p.Met4560Ile | 2:32597818-G               | [G*, A]               | 91 | [6, 16]  | missense_variant                       | 0.00470000 | 23.0  | 65.756507 |
| IV:5 | <i>BIRC6</i>    | p.Met4560Ile | 2:32597818-G               | [G*, A]               | 99 | [15, 15] | missense_variant                       | 0.00470000 | 23.0  | 65.756507 |
| IV:3 | <i>LRIG2</i>    | p.Val929Ile  | 1:113119337-G              | [G*, A]               | 99 | [11, 14] | missense_variant                       | 0.00200000 | 17.90 | 66.656440 |
| IV:5 | <i>LRIG2</i>    | p.Val929Ile  | 1:113119337-G              | [A, A]                | 74 | [0, 25]  | missense_variant                       | 0.00200000 | 17.90 | 66.656440 |
| IV:3 | <i>USP14</i>    | p.Pro350Ser  | 18:204576-C                | [C*, T]               | 99 | [15, 13] | missense_variant                       | 0.00140000 | 26.7  | 67.730224 |
| IV:5 | <i>USP14</i>    | p.Pro350Ser  | 18:204576-C                | [C*, T]               | 99 | [20, 29] | missense_variant                       | 0.00140000 | 26.7  | 67.730224 |
| IV:3 | <i>SHROOM1</i>  | p.Ser408Tyr  | 5:132824633-G              | [G*, T]               | 99 | [16, 17] | missense_variant                       | 0.00070000 | 11.15 | 68.144398 |
| IV:3 | <i>SHROOM1</i>  | p.Ser408Thr  | 5:132824634-A              | [A*, T]               | 99 | [16, 17] | missense_variant                       | 0.00070000 | 7.570 | 68.144398 |
| IV:5 | <i>SHROOM1</i>  | p.Ser408Tyr  | 5:132824633-G              | [G*, T]               | 99 | [15, 18] | missense_variant                       | 0.00070000 | 11.15 | 68.144398 |
| IV:5 | <i>SHROOM1</i>  | p.Ser408Thr  | 5:132824634-A              | [A*, T]               | 99 | [15, 17] | missense_variant                       | 0.00070000 | 7.570 | 68.144398 |
| IV:3 | <i>GIPC1</i>    | p.Arg159His  | 19:14480484-C              | [C*, T]               | 99 | [25, 21] | missense_variant&splice_region_variant | 0.00050000 | 33    | 68.737536 |
| IV:5 | <i>GIPC1</i>    | p.Arg159His  | 19:14480484-C              | [C*, T]               | 99 | [20, 19] | missense_variant&splice_region_variant | 0.00050000 | 33    | 68.737536 |
| IV:3 | <i>ATP6V0E2</i> | p.Asp171Tyr  | 7:149879546-G              | [G*, T]               | 99 | [22, 17] | missense_variant                       | 0.00170000 | 22.6  | 69.192616 |
| IV:5 | <i>ATP6V0E2</i> | p.Asp171Tyr  | 7:149879546-G              | [T, T]                | 99 | [0, 38]  | missense_variant                       | 0.00170000 | 22.6  | 69.192616 |
| IV:3 | <i>GEMIN5</i>   | p.Arg66Lys   | 5:154937155-C              | [C*, T]               | 99 | [21, 12] | missense_variant                       | 0.00200000 | 15.09 | 69.908473 |
| IV:5 | <i>GEMIN5</i>   | p.Arg66Lys   | 5:154937155-C              | [C*, T]               | 99 | [16, 21] | missense_variant                       | 0.00200000 | 15.09 | 69.908473 |
| IV:3 | <i>FXVD5</i>    | p.Thr105Met  | 19:35164177-C              | [C*, T]               | 99 | [17, 25] | missense_variant                       | 0.00100000 | 24.8  | 70.307307 |
| IV:5 | <i>FXVD5</i>    | p.Thr105Met  | 19:35164177-C              | [C*, T]               | 99 | [16, 12] | missense_variant                       | 0.00100000 | 24.8  | 70.307307 |
| IV:3 | <i>PER3</i>     | p.Thr1120Ile | 1:7835906-C                | [T, T]                | 81 | [0, 27]  | missense_variant                       | 0.00460000 | 11.93 | 70.736821 |
| IV:5 | <i>PER3</i>     | p.Thr1120Ile | 1:7835906-C                | [C*, T]               | 99 | [23, 17] | missense_variant                       | 0.00460000 | 11.93 | 70.736821 |
| IV:3 | <i>TTBK2</i>    | p.Asp1399Tyr | 15:42752266-C              | [A, A]                | 93 | [0, 31]  | missense_variant                       | 0.00430000 | 29.2  | 71.723680 |



| Case | Gene          | Variant      | Locus and Reference Allele | Allele 1 and Allele 2 | GQ | AD       | Impact                                   | AF         | CADD  | GDI       |
|------|---------------|--------------|----------------------------|-----------------------|----|----------|------------------------------------------|------------|-------|-----------|
| IV:5 | <i>TTBK2</i>  | p.Asp1399Tyr | 15:42752266-C              | [C*, A]               | 99 | [18, 19] | missense_variant                         | 0.00430000 | 29.2  | 71.723680 |
| IV:3 | <i>RASAL3</i> | p.Ala233Val  | 19:15458620-G              | [G*, A]               | 99 | [18, 17] | missense_variant                         | 0.00290000 | 16.09 | 72.173646 |
| IV:5 | <i>RASAL3</i> | p.Ala233Val  | 19:15458620-G              | [G*, A]               | 99 | [19, 13] | missense_variant                         | 0.00290000 | 16.09 | 72.173646 |
| IV:3 | <i>CAST</i>   | p.Ile120Val  | 5:96730837-A               | [A*, G]               | 99 | [19, 16] | missense_variant                         | 0.00030000 | 0.001 | 72.383290 |
| IV:5 | <i>CAST</i>   | p.Ile120Val  | 5:96730837-A               | [A*, G]               | 99 | [19, 22] | missense_variant                         | 0.00030000 | 0.001 | 72.383290 |
| IV:3 | <i>FLT4</i>   | p.Arg1320Trp | 5:180603326-G              | [G*, A]               | 99 | [10, 21] | missense_variant                         | 0.00170000 | 24.9  | 72.833257 |
| IV:5 | <i>FLT4</i>   | p.Arg1320Trp | 5:180603326-G              | [G*, A]               | 99 | [27, 25] | missense_variant                         | 0.00170000 | 24.9  | 72.833257 |
| IV:3 | <i>GLTPD2</i> | p.Leu105Pro  | 17:4789653-T               | [C, C]                | 99 | [0, 44]  | missense_variant                         | 0.00360000 | 24.8  | 72.869049 |
| IV:5 | <i>GLTPD2</i> | p.Leu105Pro  | 17:4789653-T               | [T*, C]               | 99 | [15, 24] | missense_variant                         | 0.00360000 | 24.8  | 72.869049 |
| IV:3 | <i>PRX</i>    | p.Gly1286Ser | 19:40394496-C              | [C*, T]               | 99 | [24, 18] | missense_variant                         | 0.00330000 | 21.9  | 73.053127 |
| IV:5 | <i>PRX</i>    | p.Gly1286Ser | 19:40394496-C              | [C*, T]               | 99 | [19, 23] | missense_variant                         | 0.00330000 | 21.9  | 73.053127 |
| II:3 | <i>LIPE</i>   | p.Ala418Thr  | 19:42410474-C              | [C*, T]               | 99 | [30, 23] | missense_variant                         | 0.00150000 | 22.7  | 73.206525 |
| IV:5 | <i>LIPE</i>   | p.Ala418Thr  | 19:42410474-C              | [C*, T]               | 99 | [17, 20] | missense_variant                         | 0.00150000 | 22.7  | 73.206525 |
| IV:3 | <i>UNC45A</i> | p.Ala692Val  | 15:90950155-C              | [C*, T]               | 99 | [16, 15] | missense_variant & splice_region_variant | 0.00130000 | 21.1  | 73.743417 |
| IV:5 | <i>UNC45A</i> | p.Ala692Val  | 15:90950155-C              | [C*, T]               | 99 | [24, 24] | missense_variant & splice_region_variant | 0.00130000 | 21.1  | 73.743417 |
| IV:3 | <i>CC2D2A</i> | p.Arg109Gln  | 4:15481275-G               | [G*, A]               | 99 | [15, 16] | missense_variant                         | 0.00030000 | 1.024 | 73.891701 |
| IV:5 | <i>CC2D2A</i> | p.Arg109Gln  | 4:15481275-G               | [G*, A]               | 99 | [13, 11] | missense_variant                         | 0.00030000 | 1.024 | 73.891701 |
| IV:3 | <i>HFM1</i>   | p.Lys1193Glu | 1:91276639-T               | [T*, C]               | 99 | [11, 12] | missense_variant                         | 0.00350000 | 29.4  | 73.968400 |
| IV:5 | <i>HFM1</i>   | p.Lys1193Glu | 1:91276639-T               | [T*, C]               | 99 | [19, 15] | missense_variant                         | 0.00350000 | 29.4  | 73.968400 |

GQ, genotype quality; AD, allelic depth; AF, allele frequency; NMD, nonsense mediated decay; CADD, Combined Annotation Dependent Depletion; GDI, Gene Damage Index

Supplementary Table 6. Autosomal recessive model: missense and LOF from genome sequencing data

| Case | Gene            | Variant      | Locus and Reference Allele | Allele 1 and Allele 2 | GQ | AD      | Impact                                           | AF     | CADD  | GDI      |
|------|-----------------|--------------|----------------------------|-----------------------|----|---------|--------------------------------------------------|--------|-------|----------|
| IV:5 | <i>NME4</i>     | c.517-1G>A   | 16:401946-G                | [A, A]                | 99 | [0, 42] | splice_acceptor_variant & NMD_transcript_variant | 0.0003 | .     | 13.23823 |
| IV:3 | <i>TM2D2</i>    | p.Tyr145Cys  | 8:38991543-T               | [C, C]                | 99 | [0, 36] | missense_variant & splice_region_variant         | 0.0000 | 25.0  | 19.40993 |
| IV:5 | <i>C16orf58</i> | p.Arg293Trp  | 16:31493684-G              | [A, A]                | 99 | [0, 40] | missense_variant                                 | 0.0049 | 23.0  | 40.80380 |
| IV:5 | <i>PLAU</i>     | p.Arg201Leu  | 10:73913680-G              | [T, T]                | 99 | [0, 48] | missense_variant                                 | 0.0022 | 23.8  | 44.14276 |
| IV:3 | <i>MBOAT4</i>   | p.Ser278Arg  | 8:30132417-G               | [T, T]                | 93 | [0, 31] | missense_variant                                 | 0.0006 | 1.966 | 51.81265 |
| IV:5 | <i>ZNF277</i>   | p.Ser272Leu  | 7:112336117-C              | [T, T]                | 99 | [0, 43] | missense_variant                                 | 0.0004 | 26.4  | 60.91425 |
| IV:5 | <i>ATP6V0E2</i> | p.Asp171Tyr  | 7:149879546-G              | [T, T]                | 99 | [0, 38] | missense_variant                                 | 0.0017 | 22.6  | 69.19262 |
| IV:3 | <i>PER3</i>     | p.Thr1120Ile | 1:7835906-C                | [T, T]                | 81 | [0, 27] | missense_variant                                 | 0.0046 | 11.93 | 70.73682 |
| IV:3 | <i>TTBK2</i>    | p.Asp1399Tyr | 15:42752266-C              | [A, A]                | 93 | [0, 31] | missense_variant                                 | 0.0043 | 29.2  | 71.72368 |
| IV:3 | <i>GLTPD2</i>   | p.Leu105Pro  | 17:4789653-T               | [C, C]                | 99 | [0, 44] | missense_variant                                 | 0.0036 | 24.8  | 72.86905 |

GQ, genotype quality; AD, allelic depth; AF, >allele frequency; NMD, nonsense mediated decay; CADD, Combined Annotation Dependent Depletion; GDI, Gene Damage Index

Note: USP53 was excluded because GDI > 75th percentile (threshold)

Supplementary Table 7. Antibodies used & concentrations.

| Antibody (species, conjugate)                              | Commercial concentration | Concentration applied | Source                                                         |
|------------------------------------------------------------|--------------------------|-----------------------|----------------------------------------------------------------|
| Rabbit $\alpha$ -human USP53 (PrEST) <sup>3</sup>          | 0.2 mg/ml                | 1-4 $\mu$ g/ml        | Sigma life science:<br>Product number:<br>HPA035844            |
| Mouse $\alpha$ -human USP53                                | 0.05 mg/ml               | 5-20 $\mu$ g/ml       | Novus H00054532-B01P                                           |
| $\alpha$ -Rabbit GRIP2                                     | 0.48 mg/ml               | 1-4 $\mu$ g/ml        | Invitrogen Thermo<br>Fisher scientific<br>Catalogue: PA5-48489 |
| $\alpha$ -Mouse GluA2                                      | 1mg/ml                   | 1-10 $\mu$ g/ml       | UC Davis/NIH<br>NeuroMab Facility<br>75002020; 472-1JU-17      |
| $\alpha$ -Rabbit KLH                                       | 1mg/ml                   | 1-10 $\mu$ g/ml       | A150-104A BETHYL,<br>Hamburg, Germany                          |
| [Alexa Fluor 488]-conjugated goat $\alpha$ -rabbit IgG     | 1 mg/ml                  | 2 $\mu$ g/ml          | ThermoFisher<br>Scientific, Waltham, MA<br># A32731            |
| [Alexa Fluor Plus 594]-conjugated goat $\alpha$ -mouse IgG | 1 mg/ml                  | 2 $\mu$ g/ml          | ThermoFisher<br>Scientific, Waltham, MA<br># A32742            |
| Peroxidase conjugated goat $\alpha$ -rabbit IgG (H+L)      | 10 $\mu$ g/ml            | 0.1 $\mu$ g/ml        | Invitrogen/Thermo<br>Fisher Scientific #<br>32460              |
| Peroxidase conjugated goat $\alpha$ -mouse IgG (H+L)       | 100 $\mu$ g/ml           | 0.125 $\mu$ g/ml      | Cell Signaling<br>Technology (Danvers,<br>MA) # 7076           |
| Peroxidase conjugated goat $\alpha$ -mouse IgG (L)         | 5.4 $\mu$ g /ml          | 0.05-0.2 $\mu$ g /ml  | Cell Signaling<br>Technology<br>#91196                         |

$\alpha$ -, anti-; HRP, horse radish peroxidase conjugated; KLH, keyhole limpet hemocyanin; H, heavy chain; L, light chain specific

Supplementary Table 8. Antibodies used in immunohistochemistry and western blots.

| Antibody  | Primary Antibody                                | Source                            | Description                                                                                                               | Characterization                                     |
|-----------|-------------------------------------------------|-----------------------------------|---------------------------------------------------------------------------------------------------------------------------|------------------------------------------------------|
| Primary   | $\alpha$ -USP53                                 | Sigma Life Science: HPA0035844    | Prestige validated, affinity purified, polyclonal rabbit $\alpha$ -human PrEST USP53 (tail) ) Lot R42677                  | Kamierczak et al., 2015, Fig 8; Kanwal et al. D-F    |
| Primary   | $\alpha$ -USP53                                 | Novus-Biologicals H00054532-B01P  | mouse $\alpha$ -human USP53; synthetic peptide (1-188); catalytic domain)                                                 | Manufacturer                                         |
| Primary   | $\alpha$ -USP53/preabsorbed                     | Sigma HPA0035844 + 10xAg          | Ten-fold excess APrEST78787 added to $\alpha$ -USP53                                                                      | Kanwal et al., Fig. 5M                               |
| Primary   | $\alpha$ -GRIP2                                 | Invitrogen PA5-48489 Lot XD356890 | rabbit polyclonal $\alpha$ -human GRIP2—the antigen was a KLH-conjugated, synthetic peptide (620-649) Protein A affinity. | <a href="#">Manufacturer</a> ; Kanwal et al., Fig. 5 |
| Primary   | $\alpha$ -KLH                                   | Bethyl A150-104A-7                | rabbit polyclonal $\alpha$ -keyhole limpet hemocyanin affinity purified by Bethyl Labs A150-104A-7                        | Kanwal et al., Fig. 5N                               |
| Primary   | $\alpha$ -GRIA2                                 | Antibodies Inc 75-002-020         | mouse $\alpha$ -GRIA2; Clone L31/32                                                                                       | KO validated; Deposited by Trimmer, J.S.-UC Davis    |
| Secondary | Alexa Fluor 488 goat $\alpha$ -rabbit IgG (H/L) | Thermo Fisher A32731              | cross-absorbed                                                                                                            | <a href="#">Manufacturer</a>                         |
| Secondary | Alexa Fluor 594 goat $\alpha$ -mouse IgG (H/L)  | Thermo Fisher # A32742            | cross-absorbed                                                                                                            | <a href="#">Manufacturer</a>                         |
| Secondary | HRP goat $\alpha$ -rabbit IgG (H/L)             | Cell Signaling #7074              | cross-absorbed                                                                                                            | <a href="#">Manufacturer</a>                         |
| Secondary | HRP horse $\alpha$ -mouse IgG (H/L)             | Cell Signaling #7076              | cross-absorbed                                                                                                            | <a href="#">Manufacturer</a>                         |
| Secondary | HRP goat $\alpha$ -mouse IgG(L)                 | Cell Signaling #91196             | cross-absorbed                                                                                                            | <a href="#">Manufacturer</a>                         |

$\alpha$ -, anti-; HRP, horse radish peroxidase conjugated; KLH, keyhole limpet hemocyanin; H, heavy chain; L, light chain

## **SUPPLEMENTARY MATERIALS AND METHODS**

### **Human Participants**

The study was approved by the institutional review board at the School of Biological Sciences, University of the Punjab, IRB # 00005281. Written informed consent was obtained from the participants.

A family, PSY01 (Figure 1A), was identified from the outpatient department at a local hospital. Two siblings carried the diagnosis of severe schizophrenia. Hearing was assessed normal by observation (see below), since the subjects refused audiometry. The family denied history of jaundice during proband's infancy or childhood (see below). Standard rating scales and structured interviews were used. Interviews lasted approximately 3.5 hours. Additional details about participant recruitment, assessment, interviews, and other special circumstances have been published elsewhere (1).

### **Genetic analyses**

DNA was extracted using sucrose lysis followed by salting out (2). Quality of the genomic DNA was assessed by electrophoresis on a 1% agarose gel. Samples of both affected individuals and father (Figure 1A) were analyzed by exome and whole genome sequencing which was performed commercially (Macrogen, Seoul, South Korea). All genotypes in the pedigree were confirmed with Sanger sequencing.

### **Whole-exome sequencing (WES)**

Whole-exome sequencing followed exome capture (Agilent SureSelect XT Human All Exon v5) and bridge amplification using the Illumina HiSeq 2500 with paired-end reads at 100X depth, and the data were mapped to GRCh37/hg19 assembly. Typical

sequencing output parameters are displayed (Supplementary Table 5). The variant call files (vcf) were analyzed using wANNOVAR (<https://wannovar.wglab.org/>) and [Franklin](https://franklin.genoox.com/clinical-db/home) software (<https://franklin.genoox.com/clinical-db/home>). Variants were filtered so that those with an allele frequency of 0.01 or higher in public databases ([gnomAD](#), [1000 Genomes](#), [ESP 6500](#), [TOPMed](#), [Bravo](#), [GenomeAsia](#), [iMorp](#), [Iranome](#), [GME Variome](#)) were removed. Prioritized variants from the exome data were homozygous in both affected individuals and heterozygous in the father. All exonic variants and those located up to  $\pm 10$  nucleotides in the intronic regions relative to the exons were selected. In addition, homozygosity mapping was also performed on exome data using [AgileVCFMapper](#) to identify the runs of homozygosity shared by both affected individuals but heterozygous in the parent. All intronic variants located in these regions were also examined.

The wANNOVAR files or those from Franklin included predicted pathogenic scores for these variants from many software including [Polyphen-2](#), [Mutation Taster](#), [REVEL](#), [SIFT](#), and the pathogenicity [CADD](#) scores indicating the probable impact of variation on the function of the encoded protein. The conservation of selected amino acid residues affected by variants was checked across vertebrate species. For this purpose, multiple alignments were carried out using [ClustalO](#) on the protein sequences obtained from [UniProt](#).

Prioritized variants from the hg19 exome data (Supplementary Table 3) were checked in the family for segregation by Sanger sequencing (Supplementary Figure 4) in DNA samples from all participants. Control frequencies in the

population were assessed by competitive ARMS primers PCR (3) in 400 ethnically matched, indigenous individuals.

## **Whole genome sequencing**

Whole genome sequencing (WGS) followed the Illumina (San Diego, CA) pipeline with fragmentation of 100 ng of genomic DNA using adaptive focused acoustic technology (AFA; Covaris, Woburn, MA). [TrueSeq](#) was used for creation of the library. The fragmented DNA was end-repaired to create 5'-phosphorylated, blunt-ended, double-stranded DNA molecules. Following end-repair, DNA was selected for size with a magnetic bead-based method. These DNA fragments went through the addition of a single 'A' base, and ligation of indexing adapters. The purified libraries were quantified using qPCR according to the [qPCR Quantification Protocol Guide](#) ([KAPA Library Quantification](#) kits for Illumina Sequencing platforms) and qualified using the [Agilent Technologies 2200 TapeStation](#) (Agilent, Santa Clara, CA). WGS analysis followed the [GATK](#) pipeline with variant selection detailed further below.

## **Whole Genome Sequencing Data Analysis**

### **Pre-processing**

The general GATK [workflow](#) for discovery of germline variants maps the raw reads to the GRCh38/hg38 reference genome producing an aligned file (sam/bam) sorted by coordinate. Duplicate reads were marked to mitigate biases from procedures such as PCR amplification. The base quality scores, critical for variant calling algorithms, require recalibration based on covariate measurements of calls in the dataset and in each sample. This recalibration addresses biases from sample preparation or

While our primary search was limited to variants inherited in an autosomal recessive fashion, we considered a total of five genetic models.

1) *Autosomal Dominant or Multiple Hits: Genes with two high impact (i.e., LoF) variants;* allelic depth (AD) >20; genotype quality (GQ) >50; and gene damage index (GDI) <75 percentile. 2) *Variants of Interest (VOI) or previously reported genes:* one high impact and one moderate impact (e.g., missense); AF <0.005; no quality filters. 3) *Autosomal Recessive:* one high impact and one moderate impact variant; AD >20; GQ >50; AF<0.005; and GDI <75 percentile. 4) *X-linked: Autosomal Recessive:* one high impact and one moderate impact homozygous X-linked variant; AD >20; GQ >50; AF<0.005; and GDI <75 percentile. 5) *Compound Heterozygote.* One or more high impact variants and one or more moderate impact variants in the same sample on separate haplotypes as determined by [IGV](#).

Each variant was then manually reviewed using IGV to confirm not an artifact or other cause for concern. Sporadic variant calls littering the area around the SNV were considered suspect and were checked against an existing database (gnomAD, BRAVO). Variants were reported if the number of *good* calls matched the corresponding requirements of their source (i.e., genetic model).

## **CV discovery**

### *Model free analysis*

CNVs were called from the vcf output from [smoove](#) using the aligned reads (bam files) after pre-processing as above. CNVs were filtered using [duphold](#) to select



deletions (duplications) with <0.7-fold change (>1.3-fold change, respectively) for variant depth relative to flanking regions or for genomic regions with similar GC content. [AnnotSV](#) was used for annotation of the filtered CNVs and for assignment to a category of pathogenicity: benign, likely benign, variant of unknown significance, likely pathogenic, and pathogenic. Pathogenic and likely pathogenic CNVs as well as any CNV around the genomic coordinates of the VOI (*USP53*) were examined and visualized with [samplot](#) gene. Of note, no CNV in the VOI region was called for any of the samples. Five CNV regions were called as likely pathogenic or pathogenic by AnnotSV: a) two pathogenic CNVs occurred in chromosome 4 but were present in all samples: a 304 bp deletion and a 117 kb deletion (chr4: 68508074-68625397); b) chr19: 42813046-43241094 (pathogenic) was found in only one of the affected daughters; c) two potentially pathogenic overlapping regions on chr20:29125607-30424527 and chr20: 29294818-30482698 were blacklisted (and excluded by [Genvisis](#)) and not examined further. A deletion (chr4:118712587-119795518; *USP53* region +/- 500kb) was not called in the CNV set but was visualized.

*Pedigree-based model: Rare & pathogenic.*

Because the two daughters are affected and the father is not, the vcf output from [smoove](#) was filtered additionally using the [slivar](#) tool for paternal heterozygosity and homozygosity in both affected daughters. The analysis above (model free) found only one CNV present in father and both affected daughters.

*Pedigree-based model: Rare & unknown pathogenicity.*

The vcf filtered for paternal heterozygosity and homozygosity in affected daughters was searched with AnnotSV for deletions and duplications that were not annotated as

benign loss or benign gain, respectively. The outcome was a set of 39 CNV regions with unknown significance for pathogenicity. These CNVs were inspected using samplot. Five of the 39 CNVs were blacklisted (i.e., location in low complexity regions; incomplete reference genome assembly; bioinformatic misprocessing, or limitations inherent to cohort-specific private alleles--e.g., arising from genetic ancestries or sequencing kits) (64) and were not considered further:

chr10:132914133-132914719; chr13:113136636-113136949; chr7:58189288-61967062; chr7:60039029-60527184; chr7:60527462-6053519.

## **Immunohistochemistry**

All animal studies were performed under protocols approved by the IACUC. CB57Bl/6J mice (either sex, age ~ 3 months) were anesthetized (i.p. ketamine/xylazine), and the chest was opened to perfuse the left ventricle with cold phosphate buffered saline (1XPBS) containing 4% paraformaldehyde (PFA). After dissection, the brain was fixed in cold PBS/4%PFA for 24 hours followed by treatment for 24 h with PBS containing 2% PFA/15% sucrose. Subsequently , the brain was transferred to 30% sucrose in PBS for 24 hours. The whole brain was embedded with its ventral surface on a chuck using Tissue-Tek O.C.T. Compound (Sakura, Torrence, CA) and was frozen in the cryostat at -21 °C. Transverse frozen sections (including cerebellum and olfactory bulb) were ~ 30 µm thick and and were air-dried overnight and mounted unto positively charged glass slides then stored at -80 °C.

IF histochemistry was performed as follows. Slide sections were permeabilized in PBS with 0.1% Triton X-100 (PBST) at room temperature (RT) for 10 min and then blocked with 1% goat serum in PBS at RT for 30 min followed by drainage of excess

liquid. Sections were overlaid with 100  $\mu$ l primary antibody and incubated overnight at 4 °C. The sections were washed thrice with 1XPBS, each for 5 min. They were incubated at RT after being overlaid with 100  $\mu$ l of secondary antibody. The concentrations used for IF of both primary and secondary antibodies were 1-2  $\mu$ g/ml.

Slides for anatomical identification were stained with crystal violet acetate (Nissl). Slides for IF were mounted with Fluoromount-G (Invitrogen, Waltham, MA) and glass coverslips. Sections were visualized with Evos FL Auto Fluorescence/Light microscope (ThermoFisher, Waltham, MA) with 4X (NA 0.13), 10X (NA 0.4), 20X (NA 0.8), and 40X (0.95) plan-apochromat objectives.

### **Co-immunoprecipitation (co-IP) & western blots (WB)**

All procedures were done on ice and at 4° C. The dissected brain (~ 500 mg) was added to 0.5 ml cold Syn-PER™ Synaptic Protein Extraction Reagent (SSPER, Thermo Fisher (Waltham, MA). Homogenization was performed with 10 passes using a 1 ml Dounce tissue grinder (Wheaton, Millville, NJ) with a tight pestle. After centrifugation at 1,200 g for 10 min, the pellet (P1; i.e., debris containing nuclei, mitochondria, etc., and noted to contain minimal USP53) was discarded. The supernatant (S1) was centrifuged at 15,000 g for 20 min at 4° C. The cytosolic fraction (S2) was discarded, while the pellet (P2) containing synaptosomes was resuspended in 200  $\mu$ l SSPER and 100  $\mu$ l co-IP buffer [150 mM NaCl, 10 mM Tris-HCl pH 7.4, 1 mM EDTA, 1 mM EGTA, 1x HALT inhibitor cocktail (Thermo fisher, Waltham, MA), Triton X-100 1%, NP-40 0.5%].

The remaining procedures followed the company's protocol for extraction of immune complexes with 25  $\mu$ l Protein A magnetic beads (Pierce) except the amount of primary antibody was 2.88  $\mu$ g. The beads were resuspended in 30  $\mu$ l 3X Laemmli buffer before separation on SDS-PAGE and subsequent transfer to a PVDF membrane.

After transfer of proteins, the membrane was treated with blocking buffer (5% BSA in 1X Tris Buffered Saline-Tween 20 [TBST]: 20 mM Tris base, 137 mM NaCl, 38 mM HCl, Tween 20 0.5%) for 60 min at room temperature with rocking. Subsequently, the membrane was incubated with the primary antibody in 10 ml 1X TBST for 60 minutes at room temperature followed by four subsequent washes with 1X TBST each for 5 min. To probe the blot, the secondary antibody [stabilized peroxidase conjugated goat anti-rabbit (H+L) HRP secondary antibody; Invitrogen/Thermo Fisher Scientific # 32460; stock 10  $\mu$ g/ml; 1:1000 in TBST] was added for 60 min at room temperature with rocking. Subsequently, the membrane was washed four times with TBST by rocking for 5 min each. The bands were detected using chemiluminescence with SuperSignal™ West Dura (Thermo Fisher Scientific) and recorded using a Li-Cor system (Lincoln, Nebraska).

### **Antibodies for IF and IP**

Primary antibodies included the following: 1) polyclonal rabbit anti-human PrEST USP53; Sigma HPA035844, Lot R32677 (St. Louis, MO); USP53 antibody did not cross-react to GRIP2 as confirmed with western blot (WB) ; 1  $\mu$ g/ml PBST, 1% goat serum, 1% BSA. 2) rabbit polyclonal anti-GRIP2—antigen was KLH-conjugated, synthetic peptide (620-649) of human GRIP2; Invitrogen/ThermoFisher #PA5-48489,

Lot XD3568904 (Carlsbad, CA); 0.42 mg/ml diluted with as above to 1:25 (no cross-reactivity with USP53 confirmed by WB; no cross-reactivity with GRIP1 per manufacturer). 3) mouse monoclonal anti-GluA2, IgG1 (UC Davis/NIH NeuroMab Facility, NeuroMab clone L21/32; RRID AB\_2877267; 1 mg/ml diluted as above 1:1000).

Secondary antibodies included the following: 1) stabilized peroxidase conjugated goat anti-rabbit (H+L) HRP; Invitrogen/Thermo Fisher Scientific # 32460; stock 10 ug/ml; 1:1000 in TBST; 2) horse HRP-conjugated anti-mouse IgG (H + L) 1:1500 #7076 Cell Signaling Technology (Danvers, MA); 3) [Alexa Fluor 488]-conjugated goat anti-rabbit IgG, cross-absorbed; Thermo Fisher Scientific, Waltham, MA; A32731; 2 µg/ml diluted with PBST, 1% goat serum, 1% BSA); 4) [Alexa Fluor Plus 594]-conjugated goat anti-mouse IgG (H+L), cross-absorbed; Invitrogen/ThermoFisher # A32742; 2 µg/ml diluted as above PBST.

Control immunostaining employed the following: 1) no primary antibody; 2) rabbit polyclonal anti-keyhole limpet hemocyanin; Bethyl Labs A150-104A-7 (Hamburg, Germany); 1 mg/ml diluted 1:200-1,000; 3) antigen-absorbed anti-USP53 (above) with 10x excess human antigen APrEST78787 (beginning at residue 493):

APNGFKQHGNPHLYHSQGKGSYKHDRVVPQSRASA

QIISSSKSQILAPGEKITGKVKSDNGTGYDTDSSQDSRDRGNSCDSSSKSRNR;

Atlas Antibodies, Stockholm Sweden).

## Supplementary References

1. Kanwal A, Sheikh SA, Iftikhar A, Naz S, Pardo JV. Preliminary studies on apparent Mendelian psychotic disorders in consanguineous families. *BMC Psychiatry*. 2022; 22, Article number: 709.
2. Grimberg J, Nawoschik S, Belluscio L, McKee R, Turck A, Eisenberg A. A simple and efficient non-organic procedure for the isolation of genomic DNA from blood. *Nucleic Acids Res*. 1989;17(20):8390.
3. Zhu KY, Clark JM. Addition of a competitive primer can dramatically improve the specificity of PCR amplification of specific alleles. *Biotechniques*. 1996;21(4):586.
4. Van der Auwera GA, O'Connor BD. Genomics in the Cloud: Using Docker, GATK, and WDL in Terra (1st Edition). O'Reilly Media. Sebastopol, California: O'Reilly Media; 2020.
